# Supplementary material for: Pairing of cholesterol with oxidized phospholipid species in lipid bilayers
Source: Royal Society of Chemistry journal article supplement (doi:10.1039/c3sm52310a), 2013-11-20
Supplement: c3sm52310a.pdf [file c3sm52310a.pdf]

## SUPPLEMENTARY INFORMATION

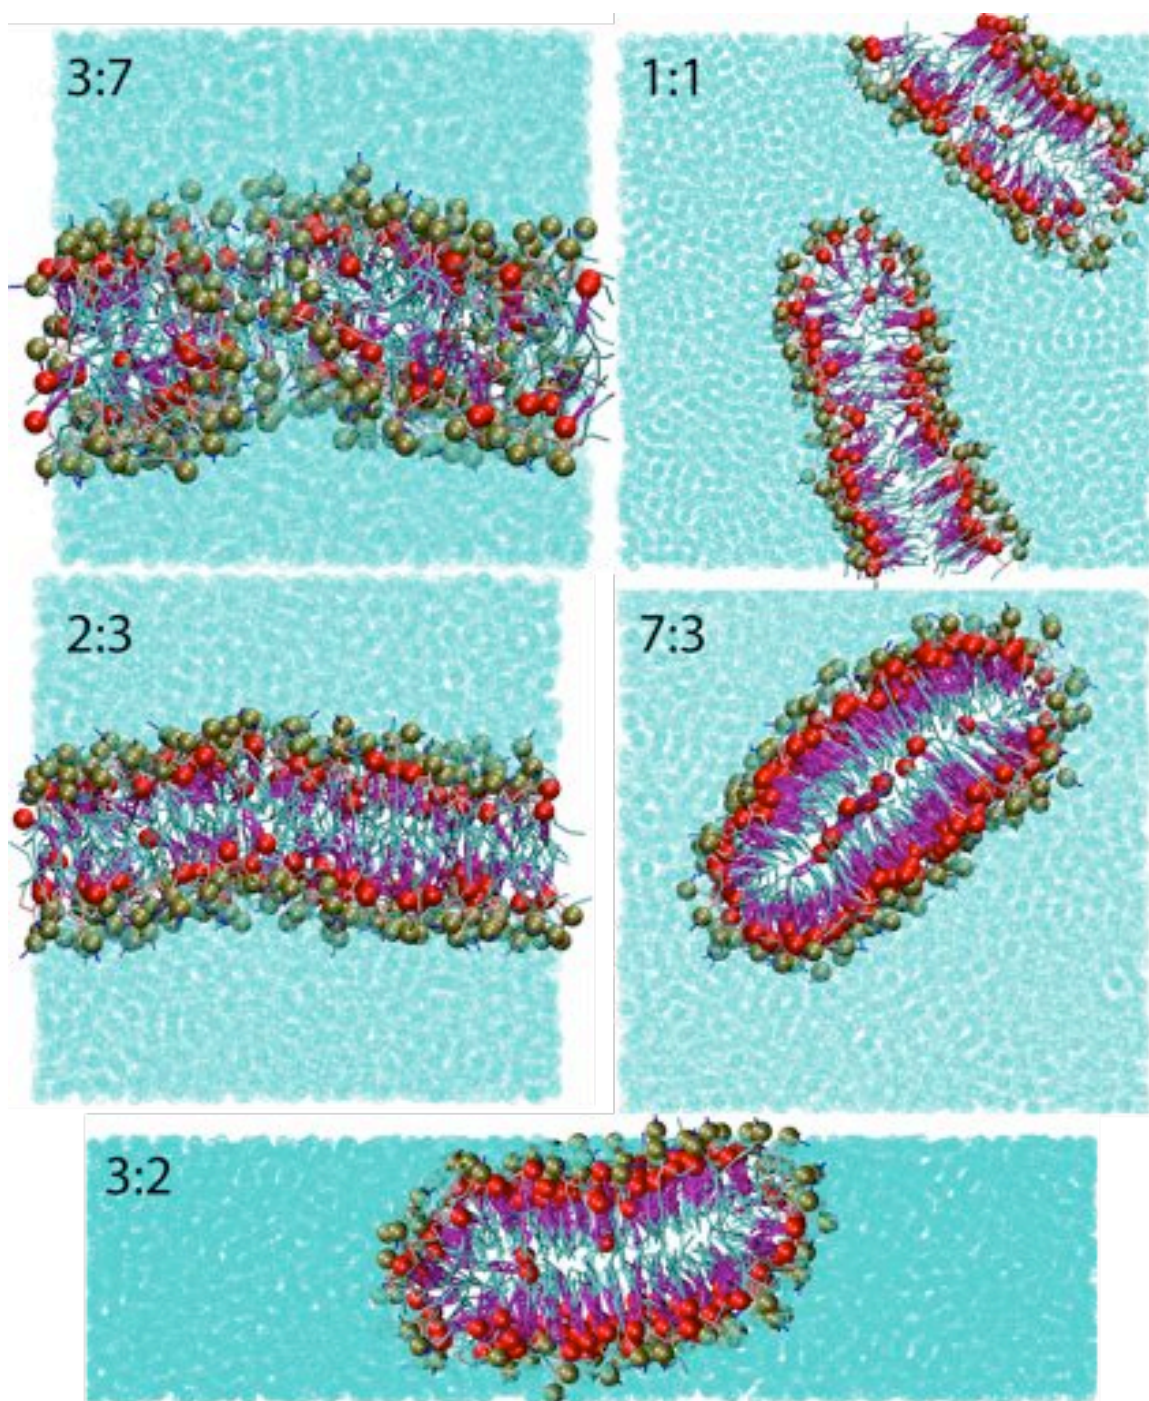

**Figure S1: Final simulation snapshots from the CHOL:PGHC self-assembly simulation at the various CHOL:PGHC ratios.**

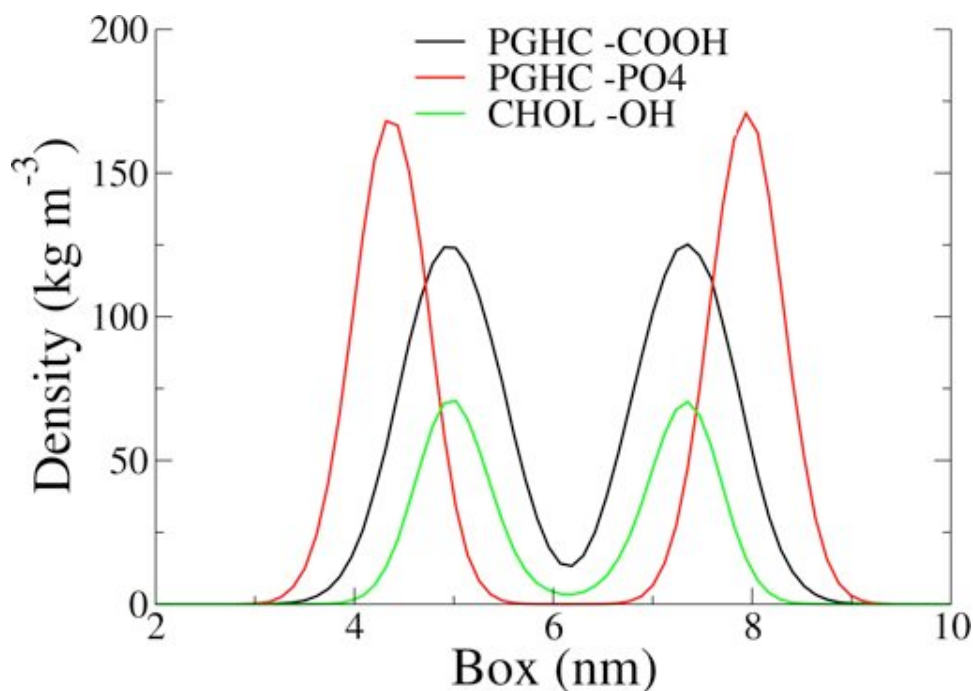

**Figure S2: Density profiles along the bilayer normal for the CHOL+PGHC self-assembly simulation at CHOL:PGHC= 2:3. The cholesterol headgroup is at the same bilayer depth as the reoriented carboxyl group of PGHC. The non-zero density at the bilayer centre for the COOH group shows that not all the COOH reverse their orientation in the bilayer. The non-zero density of the cholesterol headgroup at the bilayer centre is a result of cholesterol flip-flop**
